# Supplementary material for: The properties and efficacy of S-nZVI as a remediation agent in response to its preparation process and reaction conditions: a truth from meta-analysis
Source: Royal Society of Chemistry journal article supplement (doi:10.1039/d3en00431g), 2023-01-01
Supplement: d3en00431g1.pdf [file d3en00431g1.pdf]

## Appendix A. Supplementary data

### *The Properties and Efficacy of S-nZVI as Remediation Agent in response to its Preparation Process and Reaction Conditions: A Truth from Meta-Analysis*

Hantong Qie <sup>a</sup>, Meng Liu <sup>a</sup>, Daibing Hou <sup>a</sup>, Xuedan Cui <sup>a</sup>, Dayang Yu <sup>b</sup>, Aijun Lin <sup>a</sup>, Wenjie  
Yang <sup>c,\*</sup>, Jun Cui <sup>a,\*</sup>

<sup>a</sup> *College of Chemical Engineering, Beijing University of Chemical Technology, Beijing  
100029, PR China;*

<sup>b</sup> *School of Ecology and Environment, Beijing Technology and Business University, Beijing,  
100048, China;*

<sup>c</sup> *Joint Research Center for Eco-environment of the Yangtze River Economic Belt, Chinese  
Academy of Environmental Planning, Beijing 100012, China*

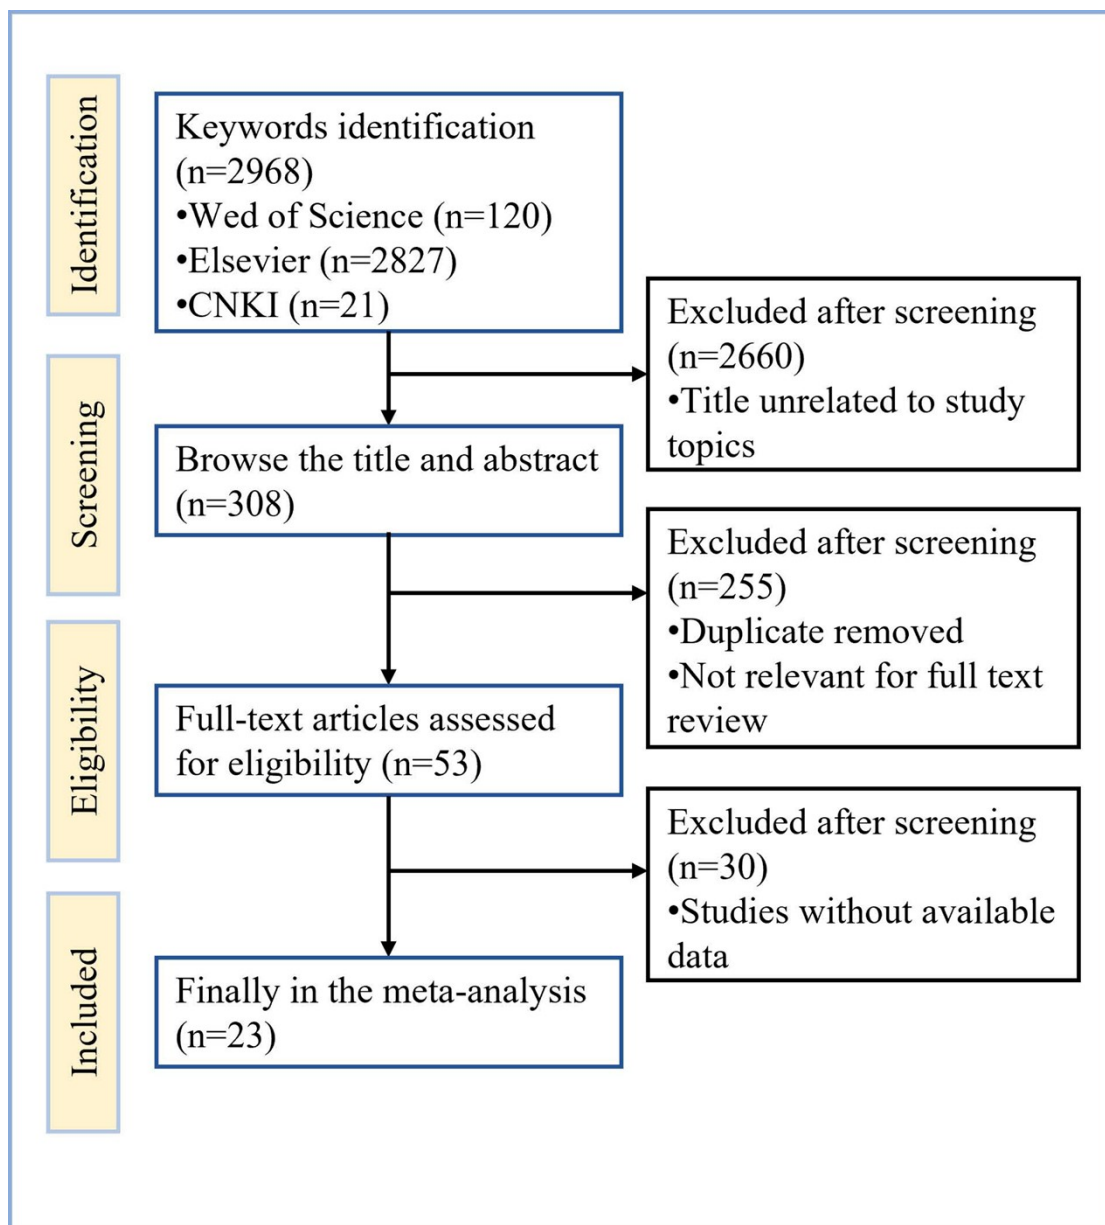

Fig. S1. The flowchart of physical and chemical properties study screening process.

Table S1. List of articles selected for the meta-analysis about efficiency

| ID | Contaminants                       | Group       | Synthesis          | Sulfur reagent                                | Guild        | Temperature | S/Fe  | pH   | Control mean | Treatment mean | Reference |
|----|------------------------------------|-------------|--------------------|-----------------------------------------------|--------------|-------------|-------|------|--------------|----------------|-----------|
| 1  | Cefotaxime (CFX)                   | Organic     | Two step synthesis | Na <sub>2</sub> S                             | removal rate | 25          | 0.75  | NA   | 11.52        | 22.28          | 1         |
| 2  | Cefotaxime (CFX)                   | Organic     | Two step synthesis | Na <sub>2</sub> S                             | removal rate | 25          | 0.875 | NA   | 11.52        | 32.48          |           |
| 3  | Cefotaxime (CFX)                   | Organic     | Two step synthesis | Na <sub>2</sub> S                             | removal rate | 25          | 1.16  | NA   | 11.52        | 23.64          |           |
| 4  | Cefotaxime (CFX)                   | Organic     | Two step synthesis | Na <sub>2</sub> S                             | removal rate | 25          | 0.875 | 6    | 11.52        | 31.24          |           |
| 5  | Cefotaxime (CFX)                   | Organic     | Two step synthesis | Na <sub>2</sub> S                             | removal rate | 25          | 0.875 | 7    | 11.52        | 31.71          |           |
| 6  | Cefotaxime (CFX)                   | Organic     | Two step synthesis | Na <sub>2</sub> S                             | removal rate | 25          | 0.875 | 8    | 11.52        | 32.94          |           |
| 7  | Cefotaxime (CFX)                   | Organic     | Two step synthesis | Na <sub>2</sub> S                             | removal rate | 25          | 0.875 | 9    | 11.52        | 29.24          |           |
| 8  | Pentachlorophenol (PCP)            | Organic     | One-step synthesis | Na <sub>2</sub> S <sub>2</sub> O <sub>4</sub> | removal rate | NA          | 0.01  | NA   | 2.68         | 4.41           | 2         |
| 9  | Pentachlorophenol (PCP)            | Organic     | One-step synthesis | Na <sub>2</sub> S <sub>2</sub> O <sub>4</sub> | removal rate | NA          | 0.017 | NA   | 2.68         | 5.43           |           |
| 10 | Pentachlorophenol (PCP)            | Organic     | One-step synthesis | Na <sub>2</sub> S <sub>2</sub> O <sub>4</sub> | removal rate | NA          | 0.1   | NA   | 2.68         | 4.36           |           |
| 11 | Pentachlorophenol (PCP)            | Organic     | One-step synthesis | Na <sub>2</sub> S <sub>2</sub> O <sub>4</sub> | removal rate | NA          | 0.02  | 5.08 | 2.68         | 5.25           |           |
| 12 | Pentachlorophenol (PCP)            | Organic     | One-step synthesis | Na <sub>2</sub> S <sub>2</sub> O <sub>4</sub> | removal rate | NA          | 0.02  | 7.21 | 2.68         | 5.69           |           |
| 13 | Pentachlorophenol (PCP)            | Organic     | One-step synthesis | Na <sub>2</sub> S <sub>2</sub> O <sub>4</sub> | removal rate | NA          | 0.02  | 8.42 | 2.68         | 5.98           |           |
| 14 | Polychlorinated Biphenyls (PCB153) | Organic     | One-step synthesis | Na <sub>2</sub> S <sub>2</sub> O <sub>4</sub> | removal rate | 25          | 0.1   | 7    | 0.19         | 0.14           | 3         |
| 15 | Polychlorinated Biphenyls (PCB153) | Organic     | One-step synthesis | Na <sub>2</sub> S <sub>2</sub> O <sub>4</sub> | removal rate | 25          | 0.1   | 4    | 0.19         | 0.08           |           |
| 16 | Polychlorinated Biphenyls (PCB153) | Organic     | One-step synthesis | Na <sub>2</sub> S <sub>2</sub> O <sub>4</sub> | removal rate | 25          | 0.1   | 6    | 0.19         | 0.1            |           |
| 17 | Polychlorinated Biphenyls (PCB153) | Organic     | One-step synthesis | Na <sub>2</sub> S <sub>2</sub> O <sub>4</sub> | removal rate | 25          | 0.1   | 7    | 0.19         | 0.12           |           |
| 18 | Polychlorinated Biphenyls (PCB153) | Organic     | One-step synthesis | Na <sub>2</sub> S <sub>2</sub> O <sub>4</sub> | removal rate | 25          | 0.1   | 8    | 0.19         | 0.13           |           |
| 19 | Polychlorinated Biphenyls (PCB153) | Organic     | One-step synthesis | Na <sub>2</sub> S <sub>2</sub> O <sub>4</sub> | removal rate | 25          | 0.1   | 10   | 0.19         | 0.16           |           |
| 20 | Cr(VI)                             | Heavy Metal | Two step synthesis | Na <sub>2</sub> S                             | removal rate | 20          | 0.1   | NA   | 29.23        | 33.97          | 4         |

|    |         |             |                    |                                               |                  |    |       |    |       |       |   |
|----|---------|-------------|--------------------|-----------------------------------------------|------------------|----|-------|----|-------|-------|---|
| 21 | Cr(VI)  | Heavy Metal | Two step synthesis | Na <sub>2</sub> S                             | removal rate     | 20 | 0.2   | NA | 29.23 | 36.01 |   |
| 22 | Cr(VI)  | Heavy Metal | Two step synthesis | Na <sub>2</sub> S                             | removal rate     | 20 | 0.3   | NA | 29.23 | 31.28 |   |
| 23 | Cr(VI)  | Heavy Metal | Two step synthesis | Na <sub>2</sub> S                             | removal rate     | 20 | 0.5   | NA | 29.23 | 29.33 |   |
| 24 | Cu (II) | Heavy Metal | One-step synthesis | Na <sub>2</sub> S <sub>2</sub> O <sub>4</sub> | removal rate     | 25 | 0.103 | 5  | 20    | 20    | 5 |
| 25 | Cu (II) | Heavy Metal | One-step synthesis | Na <sub>2</sub> S <sub>2</sub> O <sub>4</sub> | removal rate     | 25 | 0.103 | 3  | 20    | 19.98 |   |
| 26 | Cu (II) | Heavy Metal | One-step synthesis | Na <sub>2</sub> S <sub>2</sub> O <sub>4</sub> | removal rate     | 25 | 0.103 | 4  | 20    | 19.98 |   |
| 27 | Cu (II) | Heavy Metal | One-step synthesis | Na <sub>2</sub> S <sub>2</sub> O <sub>4</sub> | removal rate     | 25 | 0.103 | 5  | 20    | 19.98 |   |
| 28 | Ni (II) | Heavy Metal | One-step synthesis | Na <sub>2</sub> S <sub>2</sub> O <sub>4</sub> | removal rate     | 25 | 0.103 | 6  | 19.83 | 19.94 |   |
| 29 | Ni (II) | Heavy Metal | One-step synthesis | Na <sub>2</sub> S <sub>2</sub> O <sub>4</sub> | removal rate     | 25 | 0.103 | 5  | 19.83 | 20    |   |
| 30 | Ni (II) | Heavy Metal | One-step synthesis | Na <sub>2</sub> S <sub>2</sub> O <sub>4</sub> | removal rate     | 25 | 0.103 | 6  | 19.83 | 20    |   |
| 31 | Ni (II) | Heavy Metal | One-step synthesis | Na <sub>2</sub> S <sub>2</sub> O <sub>4</sub> | removal rate     | 25 | 0.103 | 7  | 19.83 | 20    |   |
| 32 | Cr(VI)  | Heavy Metal | One-step synthesis | Na <sub>2</sub> S <sub>2</sub> O <sub>4</sub> | C/C <sub>0</sub> | 30 | 0.5   | 5  | 23.69 | 54.3  | 6 |
| 33 | Cd (II) | Heavy Metal | One-step synthesis | Na <sub>2</sub> S <sub>2</sub> O <sub>4</sub> | removal rate     | 30 | 0.1   | 7  | 26.03 | 31.58 | 7 |
| 34 | Cd (II) | Heavy Metal | One-step synthesis | Na <sub>2</sub> S <sub>2</sub> O <sub>4</sub> | removal rate     | 30 | 0.2   | 7  | 26.03 | 80    |   |
| 35 | Cd (II) | Heavy Metal | One-step synthesis | Na <sub>2</sub> S <sub>2</sub> O <sub>4</sub> | removal rate     | 30 | 0.3   | 7  | 26.03 | 80    |   |
| 36 | Cd (II) | Heavy Metal | One-step synthesis | Na <sub>2</sub> S <sub>2</sub> O <sub>4</sub> | removal rate     | 30 | 0.4   | 7  | 26.03 | 80    |   |
| 37 | Cd (II) | Heavy Metal | One-step synthesis | Na <sub>2</sub> S <sub>2</sub> O <sub>4</sub> | removal rate     | 30 | 0.5   | 7  | 26.03 | 80    |   |
| 38 | Cd (II) | Heavy Metal | One-step synthesis | Na <sub>2</sub> S <sub>2</sub> O <sub>4</sub> | removal rate     | 30 | 0.3   | 3  | 26.03 | 77.85 |   |
| 39 | Cd (II) | Heavy Metal | One-step synthesis | Na <sub>2</sub> S <sub>2</sub> O <sub>4</sub> | removal rate     | 30 | 0.3   | 4  | 26.03 | 71.74 |   |
| 40 | Cd (II) | Heavy Metal | One-step synthesis | Na <sub>2</sub> S <sub>2</sub> O <sub>4</sub> | removal rate     | 30 | 0.3   | 5  | 26.03 | 79.94 |   |
| 41 | Cd (II) | Heavy Metal | One-step synthesis | Na <sub>2</sub> S <sub>2</sub> O <sub>4</sub> | removal rate     | 30 | 0.3   | 6  | 26.03 | 80    |   |
| 42 | Cd (II) | Heavy Metal | One-step synthesis | Na <sub>2</sub> S <sub>2</sub> O <sub>4</sub> | removal rate     | 30 | 0.3   | 7  | 26.03 | 80    |   |

|    |                                          |             |                    |                                               |                  |    |       |      |       |        |   |
|----|------------------------------------------|-------------|--------------------|-----------------------------------------------|------------------|----|-------|------|-------|--------|---|
| 43 | Cd (II)                                  | Heavy Metal | One-step synthesis | Na <sub>2</sub> S <sub>2</sub> O <sub>4</sub> | removal rate     | 20 | 0.3   | 7    | 26.03 | 66.1   | 8 |
| 44 | Cd (II)                                  | Heavy Metal | One-step synthesis | Na <sub>2</sub> S <sub>2</sub> O <sub>4</sub> | removal rate     | 25 | 0.3   | 7    | 26.03 | 70.38  |   |
| 45 | Cd (II)                                  | Heavy Metal | One-step synthesis | Na <sub>2</sub> S <sub>2</sub> O <sub>4</sub> | removal rate     | 30 | 0.3   | 7    | 26.03 | 80     |   |
| 46 | Cd (II)                                  | Heavy Metal | One-step synthesis | Na <sub>2</sub> S <sub>2</sub> O <sub>4</sub> | removal rate     | 35 | 0.3   | 7    | 26.03 | 80     |   |
| 47 | Trichloroethylene (TCE)                  | Organic     | One-step synthesis | Na <sub>2</sub> S <sub>2</sub> O <sub>4</sub> | removal rate     | 20 | 0.1   | 5.57 | 3.13  | 5.25   |   |
| 48 | Trichloroethylene (TCE)                  | Organic     | One-step synthesis | Na <sub>2</sub> S <sub>2</sub> O <sub>4</sub> | removal rate     | 20 | 0.025 | 5.57 | 3.13  | 6      |   |
| 49 | Trichloroethylene (TCE)                  | Organic     | One-step synthesis | Na <sub>2</sub> S <sub>2</sub> O <sub>4</sub> | removal rate     | 20 | 0.017 | 5.57 | 3.13  | 6      |   |
| 50 | Trichloroethylene (TCE)                  | Organic     | One-step synthesis | Na <sub>2</sub> S <sub>2</sub> O <sub>4</sub> | removal rate     | 20 | 0.013 | 5.57 | 3.13  | 5.99   |   |
| 51 | Trichloroethylene (TCE)                  | Organic     | One-step synthesis | Na <sub>2</sub> S <sub>2</sub> O <sub>4</sub> | removal rate     | 20 | 0.01  | 5.57 | 3.13  | 5.63   |   |
| 52 | Trichloroethylene (TCE)                  | Organic     | One-step synthesis | Na <sub>2</sub> S <sub>2</sub> O <sub>4</sub> | removal rate     | 20 | 0.017 | 5.57 | 3.13  | 5.83   |   |
| 53 | Trichloroethylene (TCE)                  | Organic     | One-step synthesis | Na <sub>2</sub> S <sub>2</sub> O <sub>4</sub> | removal rate     | 20 | 0.017 | 7.1  | 3.13  | 5.42   |   |
| 54 | Trichloroethylene (TCE)                  | Organic     | One-step synthesis | Na <sub>2</sub> S <sub>2</sub> O <sub>4</sub> | removal rate     | 20 | 0.017 | 8.02 | 3.13  | 5.85   |   |
| 55 | Carbon Tetrachloride (CCl <sub>4</sub> ) | Organic     | One-step synthesis | Na <sub>2</sub> S <sub>2</sub> O <sub>4</sub> | C/C <sub>0</sub> | 30 | 0.138 | 7    | 2.91  | 5.484  | 9 |
| 56 | Carbon Tetrachloride (CCl <sub>4</sub> ) | Organic     | One-step synthesis | Na <sub>2</sub> S <sub>2</sub> O <sub>4</sub> | C/C <sub>0</sub> | 30 | 0.138 | 3    | 2.91  | 5.0286 |   |
| 57 | Carbon Tetrachloride (CCl <sub>4</sub> ) | Organic     | One-step synthesis | Na <sub>2</sub> S <sub>2</sub> O <sub>4</sub> | C/C <sub>0</sub> | 30 | 0.138 | 6    | 2.91  | 5.4666 |   |
| 58 | Carbon Tetrachloride (CCl <sub>4</sub> ) | Organic     | One-step synthesis | Na <sub>2</sub> S <sub>2</sub> O <sub>4</sub> | C/C <sub>0</sub> | 30 | 0.138 | 7    | 2.91  | 5.562  |   |
| 59 | Carbon Tetrachloride (CCl <sub>4</sub> ) | Organic     | One-step synthesis | Na <sub>2</sub> S <sub>2</sub> O <sub>4</sub> | C/C <sub>0</sub> | 30 | 0.138 | 8    | 2.91  | 5.5998 |   |
| 60 | Carbon Tetrachloride (CCl <sub>4</sub> ) | Organic     | One-step synthesis | Na <sub>2</sub> S <sub>2</sub> O <sub>4</sub> | C/C <sub>0</sub> | 30 | 0.138 | 9    | 2.91  | 5.676  |   |
| 61 | Carbon Tetrachloride (CCl <sub>4</sub> ) | Organic     | One-step synthesis | Na <sub>2</sub> S <sub>2</sub> O <sub>4</sub> | C/C <sub>0</sub> | 10 | 0.138 | 7    | 2.91  | 3.8844 |   |
| 62 | Carbon Tetrachloride (CCl <sub>4</sub> ) | Organic     | One-step synthesis | Na <sub>2</sub> S <sub>2</sub> O <sub>4</sub> | C/C <sub>0</sub> | 20 | 0.138 | 7    | 2.91  | 4.7502 |   |
| 63 | Carbon Tetrachloride (CCl <sub>4</sub> ) | Organic     | One-step synthesis | Na <sub>2</sub> S <sub>2</sub> O <sub>4</sub> | C/C <sub>0</sub> | 30 | 0.138 | 7    | 2.91  | 5.481  |   |
| 64 | Carbon Tetrachloride (CCl <sub>4</sub> ) | Organic     | One-step synthesis | Na <sub>2</sub> S <sub>2</sub> O <sub>4</sub> | C/C <sub>0</sub> | 40 | 0.138 | 7    | 2.91  | 5.8272 |   |

|    |                  |         |                    |                                               |                       |    |      |     |       |        |    |    |
|----|------------------|---------|--------------------|-----------------------------------------------|-----------------------|----|------|-----|-------|--------|----|----|
| 65 | Diclofenac (DCF) | Organic | One-step synthesis | Na <sub>2</sub> S <sub>2</sub> O <sub>4</sub> | C/C <sub>0</sub>      | 25 | 0.1  | 6.5 | 0.71  | 1.42   | 10 |    |
| 66 | Diclofenac (DCF) | Organic | One-step synthesis | Na <sub>2</sub> S <sub>2</sub> O <sub>4</sub> | C/C <sub>0</sub>      | 25 | 0.2  | 6.5 | 0.71  | 1.93   |    |    |
| 67 | Diclofenac (DCF) | Organic | One-step synthesis | Na <sub>2</sub> S <sub>2</sub> O <sub>4</sub> | C/C <sub>0</sub>      | 25 | 0.3  | 6.5 | 0.71  | 2.45   |    |    |
| 68 | Diclofenac (DCF) | Organic | One-step synthesis | Na <sub>2</sub> S <sub>2</sub> O <sub>4</sub> | C/C <sub>0</sub>      | 25 | 0.4  | 6.5 | 0.71  | 1.72   |    |    |
| 69 | Diclofenac (DCF) | Organic | One-step synthesis | Na <sub>2</sub> S <sub>2</sub> O <sub>4</sub> | C/C <sub>0</sub>      | 25 | 0.3  | 3.5 | 0.71  | 2.6    |    |    |
| 70 | Diclofenac (DCF) | Organic | One-step synthesis | Na <sub>2</sub> S <sub>2</sub> O <sub>4</sub> | C/C <sub>0</sub>      | 25 | 0.3  | 4.5 | 0.71  | 2.86   |    |    |
| 71 | Diclofenac (DCF) | Organic | One-step synthesis | Na <sub>2</sub> S <sub>2</sub> O <sub>4</sub> | C/C <sub>0</sub>      | 25 | 0.3  | 5.5 | 0.71  | 2.47   |    |    |
| 72 | Diclofenac (DCF) | Organic | One-step synthesis | Na <sub>2</sub> S <sub>2</sub> O <sub>4</sub> | C/C <sub>0</sub>      | 25 | 0.3  | 6.5 | 0.71  | 2.44   |    |    |
| 73 | Diclofenac (DCF) | Organic | One-step synthesis | Na <sub>2</sub> S <sub>2</sub> O <sub>4</sub> | C/C <sub>0</sub>      | 25 | 0.3  | 7.5 | 0.71  | 1.45   |    |    |
| 74 | Diclofenac (DCF) | Organic | One-step synthesis | Na <sub>2</sub> S <sub>2</sub> O <sub>4</sub> | C/C <sub>0</sub>      | 25 | 0.3  | 8.5 | 0.71  | 0.96   |    |    |
| 75 | Florfenicol (FF) | Organic | Two step synthesis | Na <sub>2</sub> S <sub>2</sub> O <sub>4</sub> | ln(C/C <sub>0</sub> ) | 25 | 0.07 | 7   | 28.03 | 100.3  |    | 11 |
| 76 | Florfenicol (FF) | Organic | Two step synthesis | Na <sub>2</sub> S <sub>2</sub> O <sub>4</sub> | ln(C/C <sub>0</sub> ) | 25 | 0.14 | 7   | 28.03 | 100.3  |    |    |
| 77 | Florfenicol (FF) | Organic | Two step synthesis | Na <sub>2</sub> S <sub>2</sub> O <sub>4</sub> | ln(C/C <sub>0</sub> ) | 25 | 0.21 | 7   | 28.03 | 100.3  |    |    |
| 78 | Florfenicol (FF) | Organic | Two step synthesis | Na <sub>2</sub> S <sub>2</sub> O <sub>4</sub> | ln(C/C <sub>0</sub> ) | 25 | 0.28 | 7   | 28.03 | 100.3  |    |    |
| 79 | Florfenicol (FF) | Organic | Two step synthesis | Na <sub>2</sub> S <sub>2</sub> O <sub>4</sub> | ln(C/C <sub>0</sub> ) | 25 | 0.07 | 7   | 28.31 | 100.3  |    |    |
| 80 | Florfenicol (FF) | Organic | Two step synthesis | Na <sub>2</sub> S <sub>2</sub> O <sub>4</sub> | ln(C/C <sub>0</sub> ) | 25 | 0.14 | 7   | 28.31 | 100.3  |    |    |
| 81 | Florfenicol (FF) | Organic | Two step synthesis | Na <sub>2</sub> S <sub>2</sub> O <sub>4</sub> | ln(C/C <sub>0</sub> ) | 25 | 0.21 | 7   | 28.31 | 98.44  |    |    |
| 82 | Florfenicol (FF) | Organic | Two step synthesis | Na <sub>2</sub> S <sub>2</sub> O <sub>4</sub> | ln(C/C <sub>0</sub> ) | 25 | 0.28 | 7   | 28.31 | 99.62  |    |    |
| 83 | Florfenicol (FF) | Organic | Two step synthesis | Na <sub>2</sub> S                             | ln(C/C <sub>0</sub> ) | 25 | 0.07 | 7   | 28.15 | 100.13 |    |    |
| 84 | Florfenicol (FF) | Organic | Two step synthesis | Na <sub>2</sub> S                             | ln(C/C <sub>0</sub> ) | 25 | 0.14 | 7   | 28.15 | 100.13 |    |    |
| 85 | Florfenicol (FF) | Organic | Two step synthesis | Na <sub>2</sub> S                             | ln(C/C <sub>0</sub> ) | 25 | 0.21 | 7   | 28.15 | 100.13 |    |    |
| 86 | Florfenicol (FF) | Organic | Two step synthesis | Na <sub>2</sub> S                             | ln(C/C <sub>0</sub> ) | 25 | 0.28 | 7   | 28.15 | 100.13 |    |    |

|     |                                   |             |                    |                                               |                       |    |        |     |       |        |    |
|-----|-----------------------------------|-------------|--------------------|-----------------------------------------------|-----------------------|----|--------|-----|-------|--------|----|
| 87  | Florfenicol (FF)                  | Organic     | One-step synthesis | Na <sub>2</sub> S <sub>2</sub> O <sub>4</sub> | ln(C/C <sub>0</sub> ) | 25 | 0.07   | 7   | 28.26 | 100.24 |    |
| 88  | Florfenicol (FF)                  | Organic     | One-step synthesis | Na <sub>2</sub> S <sub>2</sub> O <sub>4</sub> | ln(C/C <sub>0</sub> ) | 25 | 0.14   | 7   | 28.26 | 100.13 |    |
| 89  | Florfenicol (FF)                  | Organic     | One-step synthesis | Na <sub>2</sub> S <sub>2</sub> O <sub>4</sub> | ln(C/C <sub>0</sub> ) | 25 | 0.21   | 7   | 28.26 | 100.13 |    |
| 90  | Florfenicol (FF)                  | Organic     | One-step synthesis | Na <sub>2</sub> S <sub>2</sub> O <sub>4</sub> | ln(C/C <sub>0</sub> ) | 25 | 0.28   | 7   | 28.26 | 100.3  |    |
| 91  | Pb (II)                           | Heavy Metal | One-step synthesis | Na <sub>2</sub> S <sub>2</sub> O <sub>4</sub> | C/C <sub>0</sub>      | 25 | 0.05   | 6   | 3.97  | 4.21   |    |
| 92  | Pb (II)                           | Heavy Metal | One-step synthesis | Na <sub>2</sub> S <sub>2</sub> O <sub>4</sub> | C/C <sub>0</sub>      | 25 | 0.1    | 6   | 3.97  | 5.04   |    |
| 93  | Pb (II)                           | Heavy Metal | One-step synthesis | Na <sub>2</sub> S <sub>2</sub> O <sub>4</sub> | C/C <sub>0</sub>      | 25 | 0.2    | 6   | 3.97  | 5.16   |    |
| 94  | Pb (II)                           | Heavy Metal | One-step synthesis | Na <sub>2</sub> S <sub>2</sub> O <sub>4</sub> | C/C <sub>0</sub>      | 25 | 0.3    | 6   | 3.97  | 5.18   |    |
| 95  | Pb (II)                           | Heavy Metal | One-step synthesis | Na <sub>2</sub> S <sub>2</sub> O <sub>4</sub> | C/C <sub>0</sub>      | 25 | 0.2    | 5   | 3.97  | 10.36  |    |
| 96  | Pb (II)                           | Heavy Metal | One-step synthesis | Na <sub>2</sub> S <sub>2</sub> O <sub>4</sub> | C/C <sub>0</sub>      | 25 | 0.2    | 6   | 3.97  | 10.36  |    |
| 97  | Pb (II)                           | Heavy Metal | One-step synthesis | Na <sub>2</sub> S <sub>2</sub> O <sub>4</sub> | C/C <sub>0</sub>      | 25 | 0.2    | 7.2 | 3.97  | 10.36  |    |
| 98  | Pb (II)                           | Heavy Metal | One-step synthesis | Na <sub>2</sub> S <sub>2</sub> O <sub>4</sub> | C/C <sub>0</sub>      | 25 | 0.2    | 8   | 3.97  | 10.36  |    |
| 99  | Decabromodiphenyl Ether (BDE-209) | Organic     | One-step synthesis | Na <sub>2</sub> S <sub>2</sub> O <sub>4</sub> | C/C <sub>0</sub>      | 25 | 0.05   | 7.2 | 0.55  | 0.57   |    |
| 100 | Decabromodiphenyl Ether (BDE-209) | Organic     | One-step synthesis | Na <sub>2</sub> S <sub>2</sub> O <sub>4</sub> | C/C <sub>0</sub>      | 25 | 0.1    | 7.2 | 0.55  | 0.78   |    |
| 101 | Decabromodiphenyl Ether (BDE-209) | Organic     | One-step synthesis | Na <sub>2</sub> S <sub>2</sub> O <sub>4</sub> | C/C <sub>0</sub>      | 25 | 0.2    | 7.2 | 0.55  | 1      |    |
| 102 | Decabromodiphenyl Ether (BDE-209) | Organic     | One-step synthesis | Na <sub>2</sub> S <sub>2</sub> O <sub>4</sub> | C/C <sub>0</sub>      | 25 | 0.3    | 7.2 | 0.55  | 0.93   |    |
| 103 | Trichloroethylene (TCE)           | Organic     | Two step synthesis | Na <sub>2</sub> S                             | C/C <sub>0</sub>      | 25 | 0.0038 | NA  | 13.02 | 19.97  | 13 |
| 104 | Trichloroethylene (TCE)           | Organic     | Two step synthesis | Na <sub>2</sub> S                             | C/C <sub>0</sub>      | 25 | 0.0164 | NA  | 13.02 | 19.9   |    |
| 105 | Trichloroethylene (TCE)           | Organic     | Two step synthesis | Na <sub>2</sub> S                             | C/C <sub>0</sub>      | 25 | 0.339  | NA  | 13.02 | 20     |    |
| 106 | Trichloroethylene (TCE)           | Organic     | Two step synthesis | Na <sub>2</sub> S                             | C/C <sub>0</sub>      | 25 | 0.0555 | NA  | 13.02 | 19.97  |    |
| 107 | Trichloroethylene (TCE)           | Organic     | Two step synthesis | Na <sub>2</sub> S                             | C/C <sub>0</sub>      | 25 | 0.1094 | NA  | 13.02 | 19.9   |    |
| 108 | Trichloroethylene (TCE)           | Organic     | One-step synthesis | Na <sub>2</sub> S                             | C/C <sub>0</sub>      | 22 | 1      | 7   | 6.25  | 29.78  | 14 |

|     |                                   |             |                    |                                               |                       |                     |       |     |        |        |    |
|-----|-----------------------------------|-------------|--------------------|-----------------------------------------------|-----------------------|---------------------|-------|-----|--------|--------|----|
| 109 | Trichloroethylene (TCE)           | Organic     | One-step synthesis | Na <sub>2</sub> S <sub>2</sub> O <sub>4</sub> | C/C <sub>0</sub>      | 25                  | 0.05  | NA  | 0.8    | 1.07   | 15 |
| 110 | Trichloroethylene (TCE)           | Organic     | Two step synthesis | Na <sub>2</sub> S                             | C/C <sub>0</sub>      | 25                  | 0.05  | NA  | 0.8    | 5.19   |    |
| 111 | Cd (II)                           | Heavy Metal | Two step synthesis | Na <sub>2</sub> S                             | C/C <sub>0</sub>      | ambient temperature | 0.75  | 6.2 | 39.56  | 385.08 | 16 |
| 112 | Trichloroethylene (TCE)           | Organic     | One-step synthesis | Na <sub>2</sub> S <sub>2</sub> O <sub>4</sub> | C/C <sub>0</sub>      | 35                  | 0.05  | 9   | 8.38   | 14.94  | 17 |
| 113 | Decabromodiphenyl Ether (BDE-209) | Organic     | One-step synthesis | Na <sub>2</sub> S <sub>2</sub> O <sub>4</sub> | C/C <sub>0</sub>      | 25                  | 0.2   | 7.2 | 0.2774 | 0.5    | 18 |
| 114 | Decabromodiphenyl Ether (BDE-209) | Organic     | One-step synthesis | Na <sub>2</sub> S <sub>2</sub> O <sub>4</sub> | C/C <sub>0</sub>      | 25                  | 0.2   | 3   | 0.2774 | 0.11   |    |
| 115 | Decabromodiphenyl Ether (BDE-209) | Organic     | One-step synthesis | Na <sub>2</sub> S <sub>2</sub> O <sub>4</sub> | C/C <sub>0</sub>      | 25                  | 0.2   | 5   | 0.2774 | 0.47   |    |
| 116 | Decabromodiphenyl Ether (BDE-209) | Organic     | One-step synthesis | Na <sub>2</sub> S <sub>2</sub> O <sub>4</sub> | C/C <sub>0</sub>      | 25                  | 0.2   | 6.5 | 0.2774 | 0.49   |    |
| 117 | Decabromodiphenyl Ether (BDE-209) | Organic     | One-step synthesis | Na <sub>2</sub> S <sub>2</sub> O <sub>4</sub> | C/C <sub>0</sub>      | 25                  | 0.2   | 7.2 | 0.2774 | 0.5    |    |
| 118 | Decabromodiphenyl Ether (BDE-209) | Organic     | One-step synthesis | Na <sub>2</sub> S <sub>2</sub> O <sub>4</sub> | C/C <sub>0</sub>      | 25                  | 0.2   | 8   | 0.2774 | 0.5    |    |
| 119 | Trichloroethylene (TCE)           | Organic     | One-step synthesis | Na <sub>2</sub> S                             | Post-reaction content | NA                  | 0.035 | NA  | 14.85  | 124.05 | 19 |
| 120 | Trichloroethylene (TCE)           | Organic     | One-step synthesis | Na <sub>2</sub> S                             | Post-reaction content | NA                  | 0.05  | NA  | 14.85  | 367.75 |    |
| 121 | Trichloroethylene (TCE)           | Organic     | One-step synthesis | Na <sub>2</sub> S                             | Post-reaction content | NA                  | 0.07  | NA  | 14.85  | 387.88 |    |
| 122 | Trichloroethylene (TCE)           | Organic     | One-step synthesis | Na <sub>2</sub> S                             | Post-reaction content | NA                  | 0.1   | NA  | 14.85  | 433.62 |    |
| 123 | Trichloroethylene (TCE)           | Organic     | One-step synthesis | Na <sub>2</sub> S                             | Post-reaction content | NA                  | 0.2   | NA  | 14.85  | 423.74 |    |
| 124 | Trichloroethylene (TCE)           | Organic     | One-step synthesis | Na <sub>2</sub> S                             | Post-reaction content | NA                  | 0.3   | NA  | 14.85  | 275.9  |    |
| 125 | Trichloroethylene (TCE)           | Organic     | One-step synthesis | Na <sub>2</sub> S                             | Post-reaction content | NA                  | 0.4   | NA  | 14.85  | 247.73 |    |
| 126 | Trichloroethylene (TCE)           | Organic     | Two step synthesis | Na <sub>2</sub> S                             | Post-reaction content | NA                  | 0.035 | NA  | 14.85  | 142.1  |    |



|     |                               |             |                    |                                               |                       |    |       |     |       |        |    |
|-----|-------------------------------|-------------|--------------------|-----------------------------------------------|-----------------------|----|-------|-----|-------|--------|----|
| 127 | Trichloroethylene (TCE)       | Organic     | Two step synthesis | Na <sub>2</sub> S                             | Post-reaction content | NA | 0.05  | NA  | 14.85 | 169.57 |    |
| 128 | Trichloroethylene (TCE)       | Organic     | Two step synthesis | Na <sub>2</sub> S                             | Post-reaction content | NA | 0.07  | NA  | 14.85 | 244.65 |    |
| 129 | Trichloroethylene (TCE)       | Organic     | Two step synthesis | Na <sub>2</sub> S                             | Post-reaction content | NA | 0.1   | NA  | 14.85 | 309.48 |    |
| 130 | Trichloroethylene (TCE)       | Organic     | Two step synthesis | Na <sub>2</sub> S                             | Post-reaction content | NA | 0.2   | NA  | 14.85 | 376.5  |    |
| 131 | Trichloroethylene (TCE)       | Organic     | Two step synthesis | Na <sub>2</sub> S                             | Post-reaction content | NA | 0.3   | NA  | 14.85 | 416    |    |
| 132 | Trichloroethylene (TCE)       | Organic     | Two step synthesis | Na <sub>2</sub> S                             | Post-reaction content | NA | 0.4   | NA  | 14.85 | 475.03 |    |
| 133 | Cr(VI)                        | Heavy Metal | One-step synthesis | Na <sub>2</sub> S <sub>2</sub> O <sub>4</sub> | C/C <sub>0</sub>      | 25 | 0.07  | 5   | 51.21 | 31.52  |    |
| 134 | Cr(VI)                        | Heavy Metal | One-step synthesis | Na <sub>2</sub> S <sub>2</sub> O <sub>4</sub> | C/C <sub>0</sub>      | 25 | 0.138 | 5   | 51.21 | 15.76  |    |
| 135 | Cr(VI)                        | Heavy Metal | One-step synthesis | Na <sub>2</sub> S <sub>2</sub> O <sub>4</sub> | C/C <sub>0</sub>      | 25 | 0.207 | 5   | 51.21 | 68.48  |    |
| 136 | Cr(VI)                        | Heavy Metal | One-step synthesis | Na <sub>2</sub> S <sub>2</sub> O <sub>4</sub> | C/C <sub>0</sub>      | 25 | 0.207 | 3.5 | 51.21 | 74.08  | 20 |
| 137 | Cr(VI)                        | Heavy Metal | One-step synthesis | Na <sub>2</sub> S <sub>2</sub> O <sub>4</sub> | C/C <sub>0</sub>      | 25 | 0.207 | 5   | 51.21 | 68.42  |    |
| 138 | Cr(VI)                        | Heavy Metal | One-step synthesis | Na <sub>2</sub> S <sub>2</sub> O <sub>4</sub> | C/C <sub>0</sub>      | 25 | 0.207 | 7.1 | 51.21 | 36.27  |    |
| 139 | Cr(VI)                        | Heavy Metal | One-step synthesis | Na <sub>2</sub> S <sub>2</sub> O <sub>4</sub> | C/C <sub>0</sub>      | 25 | 0.207 | 9   | 51.21 | 28.29  |    |
| 140 | Hexabromocyclododecane (HBCD) | Organic     | One-step synthesis | Na <sub>2</sub> S <sub>2</sub> O <sub>4</sub> | C/C <sub>0</sub>      | 30 | 0.2   | 7   | 30.19 | 39.75  |    |
| 141 | Hexabromocyclododecane (HBCD) | Organic     | One-step synthesis | Na <sub>2</sub> S <sub>2</sub> O <sub>4</sub> | C/C <sub>0</sub>      | 30 | 0.2   | 3   | 30.19 | 24.26  |    |
| 142 | Hexabromocyclododecane (HBCD) | Organic     | One-step synthesis | Na <sub>2</sub> S <sub>2</sub> O <sub>4</sub> | C/C <sub>0</sub>      | 30 | 0.2   | 5   | 30.19 | 39.55  |    |
| 143 | Hexabromocyclododecane (HBCD) | Organic     | One-step synthesis | Na <sub>2</sub> S <sub>2</sub> O <sub>4</sub> | C/C <sub>0</sub>      | 30 | 0.2   | 7   | 30.19 | 40     | 21 |
| 144 | Hexabromocyclododecane (HBCD) | Organic     | One-step synthesis | Na <sub>2</sub> S <sub>2</sub> O <sub>4</sub> | C/C <sub>0</sub>      | 30 | 0.2   | 9   | 30.19 | 31.96  |    |
| 145 | Hexabromocyclododecane (HBCD) | Organic     | One-step synthesis | Na <sub>2</sub> S <sub>2</sub> O <sub>4</sub> | C/C <sub>0</sub>      | 10 | 0.2   | 7   | 30.19 | 17.13  |    |

|     |                               |         |                    |                                               |                  |    |        |      |        |        |    |
|-----|-------------------------------|---------|--------------------|-----------------------------------------------|------------------|----|--------|------|--------|--------|----|
| 146 | Hexabromocyclododecane (HBCD) | Organic | One-step synthesis | Na <sub>2</sub> S <sub>2</sub> O <sub>4</sub> | C/C <sub>0</sub> | 20 | 0.2    | 7    | 30.19  | 26.9   |    |
| 147 | Hexabromocyclododecane (HBCD) | Organic | One-step synthesis | Na <sub>2</sub> S <sub>2</sub> O <sub>4</sub> | C/C <sub>0</sub> | 30 | 0.2    | 7    | 30.19  | 39.77  |    |
| 148 | Hexabromocyclododecane (HBCD) | Organic | One-step synthesis | Na <sub>2</sub> S <sub>2</sub> O <sub>4</sub> | C/C <sub>0</sub> | 40 | 0.2    | 7    | 30.19  | 39.77  |    |
| 149 | P-nitrophenol (PNP)           | Organic | Two step synthesis | Na <sub>2</sub> S                             | C/C <sub>0</sub> | 25 | 0.0484 | NA   | 74.27  | 221.82 | 22 |
| 150 | P-nitrophenol (PNP)           | Organic | Two step synthesis | Na <sub>2</sub> S                             | C/C <sub>0</sub> | 25 | 0.0967 | NA   | 74.27  | 243.32 |    |
| 151 | P-nitrophenol (PNP)           | Organic | Two step synthesis | Na <sub>2</sub> S                             | C/C <sub>0</sub> | 25 | 0.1449 | NA   | 74.27  | 304.8  |    |
| 152 | P-nitrophenol (PNP)           | Organic | Two step synthesis | Na <sub>2</sub> S                             | C/C <sub>0</sub> | 25 | 0.1934 | NA   | 74.27  | 293.53 |    |
| 153 | P-nitrophenol (PNP)           | Organic | Two step synthesis | Na <sub>2</sub> S                             | C/C <sub>0</sub> | 25 | 0.1449 | 6.77 | 74.27  | 308.05 |    |
| 154 | P-nitrophenol (PNP)           | Organic | Two step synthesis | Na <sub>2</sub> S                             | C/C <sub>0</sub> | 25 | 0.1449 | 7.6  | 74.27  | 311.93 |    |
| 155 | P-nitrophenol (PNP)           | Organic | Two step synthesis | Na <sub>2</sub> S                             | C/C <sub>0</sub> | 25 | 0.1449 | 8.41 | 74.27  | 311.75 |    |
| 156 | P-nitrophenol (PNP)           | Organic | Two step synthesis | Na <sub>2</sub> S                             | C/C <sub>0</sub> | 25 | 0.1449 | 9.11 | 74.27  | 311.75 |    |
| 157 | Trichloroethylene (TCE)       | Organic | Two step synthesis | Na <sub>2</sub> S                             | C/C <sub>0</sub> | 22 | 0.05   | 8    | 0.25   | 4.43   | 23 |
| 158 | Trichloroethylene (TCE)       | Organic | Two step synthesis | Na <sub>2</sub> S <sub>2</sub> O <sub>4</sub> | C/C <sub>0</sub> | 22 | 0.05   | 8    | 0.25   | 3.79   |    |
| 159 | Trichloroethylene (TCE)       | Organic | Two step synthesis | Na <sub>2</sub> S <sub>2</sub> O <sub>3</sub> | C/C <sub>0</sub> | 22 | 0.05   | 8    | 0.25   | 4.03   |    |
| 160 | Trichloroethylene (TCE)       | Organic | One-step synthesis | Na <sub>2</sub> S <sub>2</sub> O <sub>3</sub> | C/C <sub>0</sub> | 22 | 0.05   | 8    | 0.25   | 4.2    |    |
| 161 | Tetrabromobisphenol A (TBBPA) | Organic | One-step synthesis | Na <sub>2</sub> S <sub>2</sub> O <sub>4</sub> | C/C <sub>0</sub> | 25 | 0.51   | NA   | 4.7345 | 8.6209 | 24 |
| 162 | Trichloroethylene (TCE)       | Organic | Two step synthesis | Na <sub>2</sub> S                             | C/C <sub>0</sub> | 22 | 0.02   | NA   | 9.78   | 6.14   | 25 |
| 163 | Trichloroethylene (TCE)       | Organic | Two step synthesis | Na <sub>2</sub> S                             | C/C <sub>0</sub> | 22 | 0.03   | NA   | 9.78   | 6.5    |    |
| 164 | Trichloroethylene (TCE)       | Organic | Two step synthesis | Na <sub>2</sub> S                             | C/C <sub>0</sub> | 22 | 0.045  | NA   | 9.78   | 7.23   |    |
| 165 | Trichloroethylene (TCE)       | Organic | Two step synthesis | Na <sub>2</sub> S                             | C/C <sub>0</sub> | 22 | 0.071  | NA   | 9.78   | 6.79   |    |
| 166 | Trichloroethylene (TCE)       | Organic | Two step synthesis | Na <sub>2</sub> S                             | C/C <sub>0</sub> | 22 | 0.091  | NA   | 9.78   | 5.93   |    |
| 167 | Trichloroethylene (TCE)       | Organic | Two step synthesis | Na <sub>2</sub> S                             | C/C <sub>0</sub> | 22 | 0.005  | NA   | 9.78   | 23.13  |    |

|     |                               |             |                    |                                               |                  |    |       |    |               |        |    |
|-----|-------------------------------|-------------|--------------------|-----------------------------------------------|------------------|----|-------|----|---------------|--------|----|
| 168 | Trichloroethylene (TCE)       | Organic     | Two step synthesis | Na <sub>2</sub> S                             | C/C <sub>0</sub> | 22 | 0.025 | NA | 9.78          | 23.52  |    |
| 169 | Trichloroethylene (TCE)       | Organic     | Two step synthesis | Na <sub>2</sub> S                             | C/C <sub>0</sub> | 22 | 0.05  | NA | 9.78          | 23.11  |    |
| 170 | Trichloroethylene (TCE)       | Organic     | Two step synthesis | Na <sub>2</sub> S                             | C/C <sub>0</sub> | 22 | 0.1   | NA | 9.78          | 19.66  |    |
| 171 | Trichloroethylene (TCE)       | Organic     | Two step synthesis | Na <sub>2</sub> S                             | C/C <sub>0</sub> | 22 | 0.252 | NA | 9.78          | 20.64  |    |
| 172 | Trichloroethylene (TCE)       | Organic     | Two step synthesis | Na <sub>2</sub> S                             | C/C <sub>0</sub> | 22 | 0.505 | NA | 9.78          | 6.46   |    |
| 173 | Cd (II)                       | Heavy Metal | One-step synthesis | Na <sub>2</sub> S <sub>2</sub> O <sub>4</sub> | removal rate     | 22 | 0.035 | NA | 42.64         | 32.24  |    |
| 174 | Cd (II)                       | Heavy Metal | One-step synthesis | Na <sub>2</sub> S <sub>2</sub> O <sub>4</sub> | removal rate     | 22 | 0.07  | NA | 42.64         | 16.11  |    |
| 175 | Cd (II)                       | Heavy Metal | One-step synthesis | Na <sub>2</sub> S <sub>2</sub> O <sub>4</sub> | removal rate     | 22 | 0.14  | NA | 42.64         | 25.2   |    |
| 176 | Cd (II)                       | Heavy Metal | One-step synthesis | Na <sub>2</sub> S <sub>2</sub> O <sub>4</sub> | removal rate     | 22 | 0.21  | NA | 42.64         | 57.73  |    |
| 177 | Cd (II)                       | Heavy Metal | One-step synthesis | Na <sub>2</sub> S <sub>2</sub> O <sub>4</sub> | removal rate     | 22 | 0.28  | NA | 42.64         | 81.76  |    |
| 178 | Cd (II)                       | Heavy Metal | One-step synthesis | Na <sub>2</sub> S <sub>2</sub> O <sub>4</sub> | removal rate     | 22 | 0.28  | 4  | 42.64         | 32     |    |
| 179 | Cd (II)                       | Heavy Metal | One-step synthesis | Na <sub>2</sub> S <sub>2</sub> O <sub>4</sub> | removal rate     | 22 | 0.28  | 5  | 42.64         | 76.37  |    |
| 180 | Cd (II)                       | Heavy Metal | One-step synthesis | Na <sub>2</sub> S <sub>2</sub> O <sub>4</sub> | removal rate     | 22 | 0.28  | 6  | 42.64         | 79.51  |    |
| 181 | Cd (II)                       | Heavy Metal | One-step synthesis | Na <sub>2</sub> S <sub>2</sub> O <sub>4</sub> | removal rate     | 22 | 0.28  | 7  | 42.64         | 79.67  |    |
| 182 | Cd (II)                       | Heavy Metal | One-step synthesis | Na <sub>2</sub> S <sub>2</sub> O <sub>4</sub> | removal rate     | 22 | 0.28  | 8  | 42.64         | 79.84  |    |
| 183 | Cd (II)                       | Heavy Metal | One-step synthesis | Na <sub>2</sub> S <sub>2</sub> O <sub>4</sub> | removal rate     | 22 | 0.28  | 9  | 42.64         | 79.84  |    |
| 184 | Zn (II)                       | Heavy Metal | One-step synthesis | Na <sub>2</sub> S                             | C/C <sub>0</sub> | NA | 0.75  | NA | 300           | 216.97 | 27 |
| 185 | Ni (II)                       | Heavy Metal | One-step synthesis | Na <sub>2</sub> S                             | C/C <sub>0</sub> | NA | 0.75  | NA | 287.704<br>92 | 150.9  |    |
| 186 | Tetrabromobisphenol A (TBBPA) | Organic     | Two step synthesis | S <sup>0</sup>                                | C/C <sub>0</sub> | 30 | 0.015 | NA | 5.73          | 8.1    | 28 |
| 187 | Tetrabromobisphenol A (TBBPA) | Organic     | Two step synthesis | S <sup>0</sup>                                | C/C <sub>0</sub> | 30 | 0.025 | NA | 5.73          | 8.7    |    |
| 188 | Tetrabromobisphenol A (TBBPA) | Organic     | Two step synthesis | S <sup>0</sup>                                | C/C <sub>0</sub> | 30 | 0.05  | NA | 5.73          | 8.7    |    |
| 189 | Tetrabromobisphenol A (TBBPA) | Organic     | Two step synthesis | S <sup>0</sup>                                | C/C <sub>0</sub> | 30 | 0.1   | NA | 5.73          | 8.7    |    |

|     |                               |             |                    |                                               |                  |    |       |    |      |       |  |
|-----|-------------------------------|-------------|--------------------|-----------------------------------------------|------------------|----|-------|----|------|-------|--|
| 190 | Tetrabromobisphenol A (TBBPA) | Organic     | Two step synthesis | S <sup>0</sup>                                | C/C <sub>0</sub> | 30 | 0.25  | NA | 5.73 | 1.26  |  |
| 191 | Tetrabromobisphenol A (TBBPA) | Organic     | Two step synthesis | Na <sub>2</sub> S <sub>2</sub> O <sub>4</sub> | C/C <sub>0</sub> | 30 | 0.75  | NA | 5.73 | 8.7   |  |
| 192 | Tetrabromobisphenol A (TBBPA) | Organic     | Two step synthesis | Na <sub>2</sub> S <sub>2</sub> O <sub>4</sub> | C/C <sub>0</sub> | 30 | 0.5   | NA | 5.73 | 8.63  |  |
| 193 | Tetrabromobisphenol A (TBBPA) | Organic     | Two step synthesis | Na <sub>2</sub> S <sub>2</sub> O <sub>4</sub> | C/C <sub>0</sub> | 30 | 0.1   | NA | 5.73 | 1.77  |  |
| 194 | Tetrabromobisphenol A (TBBPA) | Organic     | Two step synthesis | Na <sub>2</sub> S <sub>2</sub> O <sub>4</sub> | C/C <sub>0</sub> | 30 | 0.05  | NA | 5.73 | 0.7   |  |
| 195 | Tetrabromobisphenol A (TBBPA) | Organic     | Two step synthesis | Na <sub>2</sub> S <sub>2</sub> O <sub>4</sub> | C/C <sub>0</sub> | 30 | 0.025 | NA | 5.73 | 3.82  |  |
| 196 | Tetrabromobisphenol A (TBBPA) | Organic     | Two step synthesis | Na <sub>2</sub> S <sub>2</sub> O <sub>4</sub> | C/C <sub>0</sub> | 30 | 0.015 | NA | 5.73 | 4.57  |  |
| 197 | Tetrabromobisphenol A (TBBPA) | Organic     | Two step synthesis | Na <sub>2</sub> S                             | C/C <sub>0</sub> | 30 | 0.5   | NA | 5.73 | 0.83  |  |
| 198 | Tetrabromobisphenol A (TBBPA) | Organic     | Two step synthesis | Na <sub>2</sub> S                             | C/C <sub>0</sub> | 30 | 0.3   | NA | 5.73 | 3.31  |  |
| 199 | Tetrabromobisphenol A (TBBPA) | Organic     | Two step synthesis | Na <sub>2</sub> S                             | C/C <sub>0</sub> | 30 | 0.1   | NA | 5.73 | 3.62  |  |
| 200 | Tetrabromobisphenol A (TBBPA) | Organic     | Two step synthesis | Na <sub>2</sub> S                             | C/C <sub>0</sub> | 30 | 0.05  | NA | 5.73 | 6.86  |  |
| 201 | Tetrabromobisphenol A (TBBPA) | Organic     | Two step synthesis | Na <sub>2</sub> S                             | C/C <sub>0</sub> | 30 | 0.025 | NA | 5.73 | 6.77  |  |
| 202 | Tetrabromobisphenol A (TBBPA) | Organic     | Two step synthesis | Na <sub>2</sub> S                             | C/C <sub>0</sub> | 30 | 0.015 | NA | 5.73 | 5.12  |  |
| 203 | Mo (VI)                       | Heavy Metal | One-step synthesis | Na <sub>2</sub> S <sub>2</sub> O <sub>4</sub> | C/C <sub>0</sub> | 25 | 0.1   | 7  | 12.3 | 67.62 |  |
| 204 | Mo (VI)                       | Heavy Metal | One-step synthesis | Na <sub>2</sub> S <sub>2</sub> O <sub>4</sub> | C/C <sub>0</sub> | 25 | 0.5   | 7  | 12.3 | 87.3  |  |
| 205 | Mo (VI)                       | Heavy Metal | One-step synthesis | Na <sub>2</sub> S <sub>2</sub> O <sub>4</sub> | C/C <sub>0</sub> | 25 | 1     | 7  | 12.3 | 68.85 |  |
| 206 | Mo (VI)                       | Heavy Metal | One-step synthesis | Na <sub>2</sub> S <sub>2</sub> O <sub>4</sub> | C/C <sub>0</sub> | 25 | 0.5   | 4  | 12.3 | 91.11 |  |
| 207 | Mo (VI)                       | Heavy Metal | One-step synthesis | Na <sub>2</sub> S <sub>2</sub> O <sub>4</sub> | C/C <sub>0</sub> | 25 | 0.5   | 5  | 12.3 | 93.65 |  |
| 208 | Mo (VI)                       | Heavy Metal | One-step synthesis | Na <sub>2</sub> S <sub>2</sub> O <sub>4</sub> | C/C <sub>0</sub> | 25 | 0.5   | 6  | 12.3 | 84.76 |  |
| 209 | Mo (VI)                       | Heavy Metal | One-step synthesis | Na <sub>2</sub> S <sub>2</sub> O <sub>4</sub> | C/C <sub>0</sub> | 25 | 0.5   | 7  | 12.3 | 77.78 |  |
| 210 | Mo (VI)                       | Heavy Metal | One-step synthesis | Na <sub>2</sub> S <sub>2</sub> O <sub>4</sub> | C/C <sub>0</sub> | 25 | 0.5   | 8  | 12.3 | 9.84  |  |
| 211 | Mo (VI)                       | Heavy Metal | One-step synthesis | Na <sub>2</sub> S <sub>2</sub> O <sub>4</sub> | C/C <sub>0</sub> | 25 | 0.5   | 9  | 12.3 | 3.17  |  |

|     |                                          |             |                    |                                               |                       |    |       |   |       |       |    |
|-----|------------------------------------------|-------------|--------------------|-----------------------------------------------|-----------------------|----|-------|---|-------|-------|----|
| 212 | Polybrominated Diphenyl Ethers (BDE-209) | Organic     | One-step synthesis | Na <sub>2</sub> S <sub>2</sub> O <sub>4</sub> | C/C <sub>0</sub>      | 25 | 0.517 | 6 | 0.23  | 0.88  | 30 |
| 213 | Polybrominated Diphenyl Ethers (BDE-47)  | Organic     | One-step synthesis | Na <sub>2</sub> S <sub>2</sub> O <sub>4</sub> | C/C <sub>0</sub>      | 25 | 0.517 | 6 | 0.07  | 0.09  |    |
| 214 | As (III)                                 | Heavy Metal | One-step synthesis | Na <sub>2</sub> S <sub>2</sub> O <sub>4</sub> | ln(C/C <sub>0</sub> ) | NA | 0.025 | 7 | 19.65 | 19.9  | 31 |
| 215 | As (III)                                 | Heavy Metal | One-step synthesis | Na <sub>2</sub> S <sub>2</sub> O <sub>4</sub> | ln(C/C <sub>0</sub> ) | NA | 0.05  | 7 | 19.65 | 19.93 |    |
| 216 | As (III)                                 | Heavy Metal | One-step synthesis | Na <sub>2</sub> S <sub>2</sub> O <sub>4</sub> | ln(C/C <sub>0</sub> ) | NA | 0.1   | 7 | 19.65 | 19.98 |    |
| 217 | As (III)                                 | Heavy Metal | One-step synthesis | Na <sub>2</sub> S <sub>2</sub> O <sub>4</sub> | ln(C/C <sub>0</sub> ) | NA | 0.15  | 7 | 19.65 | 19.84 |    |
| 218 | As (III)                                 | Heavy Metal | One-step synthesis | Na <sub>2</sub> S <sub>2</sub> O <sub>4</sub> | ln(C/C <sub>0</sub> ) | NA | 0.2   | 7 | 19.65 | 18.98 |    |
| 219 | As (V)                                   | Heavy Metal | One-step synthesis | Na <sub>2</sub> S <sub>2</sub> O <sub>4</sub> | ln(C/C <sub>0</sub> ) | NA | 0.025 | 7 | 19.49 | 19.83 |    |
| 220 | As (V)                                   | Heavy Metal | One-step synthesis | Na <sub>2</sub> S <sub>2</sub> O <sub>4</sub> | ln(C/C <sub>0</sub> ) | NA | 0.05  | 7 | 19.49 | 19.92 |    |
| 221 | As (V)                                   | Heavy Metal | One-step synthesis | Na <sub>2</sub> S <sub>2</sub> O <sub>4</sub> | ln(C/C <sub>0</sub> ) | NA | 0.1   | 7 | 19.49 | 19.94 |    |
| 222 | As (V)                                   | Heavy Metal | One-step synthesis | Na <sub>2</sub> S <sub>2</sub> O <sub>4</sub> | ln(C/C <sub>0</sub> ) | NA | 0.15  | 7 | 19.49 | 19.78 |    |
| 223 | As (V)                                   | Heavy Metal | One-step synthesis | Na <sub>2</sub> S <sub>2</sub> O <sub>4</sub> | ln(C/C <sub>0</sub> ) | NA | 0.2   | 7 | 19.49 | 19.65 |    |

Table S2. List of articles selected for the meta-analysis about characterization

| ID | Synthesis          | Sulfur reagent                                | S/Fe   | Size Distribution | mean | minSe | maxSe | Reference |
|----|--------------------|-----------------------------------------------|--------|-------------------|------|-------|-------|-----------|
| 1  | One-step synthesis | Na <sub>2</sub> S <sub>2</sub> O <sub>4</sub> | 0      | 50-80 nm          | 65   | 15    | 15    | 32        |
| 2  | Two-step synthesis | Na <sub>2</sub> S                             | 0      | 50nm              | 50   | 0     | 0     | 33        |
| 3  | Two-step synthesis | Na <sub>2</sub> S                             | 0.1    | 100nm             | 100  | 0     | 0     |           |
| 4  | Two-step synthesis | Na <sub>2</sub> S                             | 0.0000 | 74.5±27.3         | 75   | 27.3  | 27.3  | 13        |
| 5  | Two-step synthesis | Na <sub>2</sub> S                             | 0.0057 | 72.6±24.9         | 73   | 24.9  | 24.9  |           |
| 6  | Two-step synthesis | Na <sub>2</sub> S                             | 0.0286 | 72.3±24.8         | 72   | 24.8  | 24.8  |           |
| 7  | Two-step synthesis | Na <sub>2</sub> S                             | 0.1429 | 75.4±26.2         | 75   | 26.2  | 26.2  |           |
| 8  | One-step synthesis | Na <sub>2</sub> S <sub>2</sub> O <sub>4</sub> | 0.0000 | 80~100            | 90   | 10    | 10    | 5         |
| 9  | One-step synthesis | Na <sub>2</sub> S <sub>2</sub> O <sub>4</sub> | 0.1030 | 100~200           | 150  | 50    | 50    |           |
| 10 | One-step synthesis | Na <sub>2</sub> S·9H <sub>2</sub> O           | 0.0833 | 20 and 427        | 224  | 203   | 203   | 34        |
| 11 | One-step synthesis | Na <sub>2</sub> S                             | 0.75   | 50-100            | 75   | 0     | 0     | 16        |
| 12 | Two-step synthesis | Na <sub>2</sub> S                             | 0      | 251.9             | 252  | 0     | 0     | 18        |
| 13 | Two-step synthesis | Na <sub>2</sub> S                             | 0.2    | 236.8             | 237  | 0     | 0     |           |
| 14 | Two-step synthesis | Na <sub>2</sub> S                             | 0      | 30                | 30   | 0     | 0     | 35        |
| 15 | Two-step synthesis | Na <sub>2</sub> S                             | 0.3    | 20                | 20   | 0     | 0     |           |
| 16 | One-step synthesis | Na <sub>2</sub> S <sub>2</sub> O <sub>4</sub> | 0      | 80-100            | 90   | 10    | 10    | 36        |
| 17 | One-step synthesis | Na <sub>2</sub> S <sub>2</sub> O <sub>4</sub> | 0.103  | 100-200           | 150  | 50    | 50    |           |

|    |                    |                                               |        |         |     |    |    |    |
|----|--------------------|-----------------------------------------------|--------|---------|-----|----|----|----|
| 18 | Two-step synthesis | Na <sub>2</sub> S                             | 0      | 30-80   | 55  | 25 | 25 | 37 |
| 19 | One-step synthesis | Na <sub>2</sub> S <sub>2</sub> O <sub>4</sub> | 0      | 50-70   | 60  | 10 | 10 | 38 |
| 20 | One-step synthesis | Na <sub>2</sub> S <sub>2</sub> O <sub>4</sub> | 0.5    | 100     | 100 | 0  | 0  |    |
| 21 | One-step synthesis | Na <sub>2</sub> S <sub>2</sub> O <sub>4</sub> | 0      | 70-110  | 90  | 20 | 20 | 7  |
| 22 | One-step synthesis | Na <sub>2</sub> S <sub>2</sub> O <sub>4</sub> | 0.3    | 100     | 100 | 0  | 0  |    |
| 23 | One-step synthesis | Na <sub>2</sub> S <sub>2</sub> O <sub>4</sub> | 0.000  | 10-20   | 15  | 5  | 5  | 8  |
| 24 | One-step synthesis | Na <sub>2</sub> S <sub>2</sub> O <sub>4</sub> | 0.001  | 50.000  | 50  | 0  | 0  |    |
| 25 | One-step synthesis | Na <sub>2</sub> S <sub>2</sub> O <sub>4</sub> | 0.017  | 100.000 | 100 | 0  | 0  |    |
| 26 | One-step synthesis | Na <sub>2</sub> S <sub>2</sub> O <sub>4</sub> | 0.100  | 200.000 | 200 | 0  | 0  |    |
| 27 | One-step synthesis | Na <sub>2</sub> S <sub>2</sub> O <sub>4</sub> | 0.000  | 100.000 | 100 | 0  | 0  | 39 |
| 28 | One-step synthesis | Na <sub>2</sub> S <sub>2</sub> O <sub>4</sub> | 0.210  | 200.000 | 200 | 0  | 0  |    |
| 29 | One-step synthesis | Na <sub>2</sub> S <sub>2</sub> O <sub>4</sub> | 0      | 60      | 60  | 0  | 0  | 10 |
| 30 | One-step synthesis | Na <sub>2</sub> S <sub>2</sub> O <sub>4</sub> | 0.3    | 270     | 270 | 0  | 0  |    |
| 31 | Two-step synthesis | Na <sub>2</sub> S                             | 0.0000 | 50.0000 | 50  | 0  | 0  | 22 |
| 32 | Two-step synthesis | Na <sub>2</sub> S                             | 0.1449 | 50.0000 | 50  | 0  | 0  |    |
| 33 | One-step synthesis | Na <sub>2</sub> S <sub>2</sub> O <sub>3</sub> | 0.05   | 100     | 100 | 0  | 0  | 23 |
| 34 | Two-step synthesis | Na <sub>2</sub> S <sub>2</sub> O <sub>3</sub> | 0.05   | 50      | 50  | 0  | 0  |    |
| 35 | Two-step synthesis | Na <sub>2</sub> S                             | 0      | 20-80   | 50  | 30 | 30 | 25 |
| 36 | Two-step synthesis | Na <sub>2</sub> S                             | 0.040  | 150.000 | 150 | 0  | 0  |    |

|    |                    |                                               |       |           |     |     |     |    |
|----|--------------------|-----------------------------------------------|-------|-----------|-----|-----|-----|----|
| 37 | Two-step synthesis | Na <sub>2</sub> S                             | 0.067 | 201.000   | 201 | 0   | 0   |    |
| 38 | One-step synthesis | Na <sub>2</sub> S <sub>2</sub> O <sub>4</sub> | 0.28  | 200       | 200 | 0   | 0   | 26 |
| 39 | One-step synthesis | Na <sub>2</sub> S <sub>2</sub> O <sub>4</sub> | 0     | 70-110    | 90  | 20  | 20  | 40 |
| 40 | One-step synthesis | Na <sub>2</sub> S <sub>2</sub> O <sub>4</sub> | 0.3   | 120-320   | 220 | 100 | 100 |    |
| 41 | One-step synthesis | Na <sub>2</sub> S <sub>2</sub> O <sub>3</sub> | 0     | 54.5-67.7 | 61  | 6.5 | 6.5 | 41 |
| 42 | One-step synthesis | Na <sub>2</sub> S <sub>2</sub> O <sub>3</sub> | 0.25  | 89.9-94.5 | 92  | 2.1 | 2.1 |    |
| 43 | One-step synthesis | Na <sub>2</sub> S <sub>2</sub> O <sub>4</sub> | 0.00  | 50-100    | 75  | 25  | 25  | 42 |
| 44 | One-step synthesis | Na <sub>2</sub> S <sub>2</sub> O <sub>4</sub> | 0.03  | 50        | 50  | 0   | 0   |    |
| 45 | One-step synthesis | Na <sub>2</sub> S <sub>2</sub> O <sub>4</sub> | 0     | 80 ~ 100  | 90  | 10  | 10  | 3  |
| 46 | One-step synthesis | Na <sub>2</sub> S <sub>2</sub> O <sub>4</sub> | 0.103 | 100 ~ 200 | 150 | 50  | 50  |    |



Table S3. Turn R into percentage of increased decontamination capacity

| Fig. | R     |        |      | Percentage % |        |        |
|------|-------|--------|------|--------------|--------|--------|
|      | Mean  | 95% CI |      | Mean         | 95% CI |        |
| 2b   | 0.45  | 0.28   | 0.62 | 56.83        | 32.31  | 85.89  |
|      | 0.78  | 0.62   | 0.94 | 118.15       | 85.89  | 156.00 |
| 2c   | 0.00  | -0.64  | 0.65 | 0.00         | -47.27 | 91.55  |
|      | 0.02  | -0.63  | 0.66 | 2.02         | -46.74 | 93.48  |
|      | 0.43  | 0.00   | 0.87 | 53.73        | 0.00   | 138.69 |
|      | 0.59  | 0.13   | 1.04 | 80.40        | 13.88  | 182.92 |
|      | 0.73  | 0.44   | 1.01 | 107.51       | 55.27  | 174.56 |
|      | 0.92  | 0.37   | 1.46 | 150.93       | 44.77  | 330.60 |
|      | -0.03 | -0.45  | 0.39 | -2.96        | -36.24 | 47.70  |
|      | 0.00  | -0.72  | 0.72 | 0.00         | -51.32 | 105.44 |
|      | 1.00  | 0.54   | 1.46 | 171.83       | 71.60  | 330.60 |
|      | 1.27  | 0.88   | 1.66 | 256.09       | 141.09 | 425.93 |
|      | 0.06  | -0.42  | 0.54 | 6.18         | -34.30 | 71.60  |
|      | 1.29  | 0.81   | 1.78 | 263.28       | 124.79 | 492.99 |
|      | -0.12 | -0.76  | 0.52 | -11.31       | -53.23 | 68.20  |
|      | 0.58  | 0.08   | 1.09 | 78.60        | 8.33   | 197.43 |
|      | -0.47 | -1.06  | 0.12 | -37.50       | -65.35 | 12.75  |
|      | 0.65  | 0.07   | 1.24 | 91.55        | 7.25   | 245.56 |
|      | 1.35  | 0.84   | 1.86 | 285.74       | 131.64 | 542.37 |
|      | -0.27 | -0.61  | 0.07 | -23.66       | -45.66 | 7.25   |
|      | 1.30  | 1.08   | 1.52 | 266.93       | 194.47 | 357.22 |
| 3a   | 0.45  | 0.26   | 0.63 | 56.83        | 29.69  | 87.76  |
|      | 0.54  | -0.14  | 1.21 | 71.60        | -13.06 | 235.35 |
|      | 0.73  | 0.51   | 0.96 | 107.51       | 66.53  | 161.17 |
|      | 0.83  | 0.60   | 1.06 | 129.33       | 82.21  | 188.64 |
| 3b   | 0.24  | -0.32  | 0.81 | 27.12        | -27.39 | 124.79 |

|    |       |       |      |        |        |        |
|----|-------|-------|------|--------|--------|--------|
|    | 0.47  | 0.29  | 0.66 | 60.00  | 33.64  | 93.48  |
|    | 1.16  | 0.92  | 1.40 | 218.99 | 150.93 | 305.52 |
|    | 0.51  | 0.31  | 0.71 | 66.53  | 36.34  | 103.40 |
|    | 0.02  | -0.77 | 0.81 | 2.02   | -53.70 | 124.79 |
| 3c | -0.19 | -0.66 | 0.28 | -17.30 | -48.31 | 32.31  |
|    | 0.25  | 0.04  | 0.46 | 28.40  | 4.08   | 58.41  |
|    | 0.94  | 0.58  | 1.30 | 156.00 | 78.60  | 266.93 |
|    | 0.94  | 0.59  | 1.29 | 156.00 | 80.40  | 263.28 |
|    | 0.84  | 0.57  | 1.11 | 131.64 | 76.83  | 203.44 |
|    | 0.65  | 0.41  | 0.89 | 91.55  | 50.68  | 143.51 |
|    | 1.35  | 0.85  | 1.85 | 285.74 | 133.96 | 535.98 |
|    | 0.58  | 0.08  | 1.07 | 78.60  | 8.33   | 191.54 |
| 4a | 0.55  | 0.28  | 0.82 | 73.33  | 32.31  | 127.05 |
|    | 0.69  | 0.40  | 0.98 | 99.37  | 49.18  | 166.45 |
|    | 0.08  | -0.44 | 0.61 | 8.33   | -35.60 | 84.04  |
|    | 0.62  | 0.36  | 0.88 | 85.89  | 43.33  | 141.09 |
|    | 0.77  | 0.51  | 1.02 | 115.98 | 66.53  | 177.32 |
|    | 0.91  | 0.65  | 1.17 | 148.43 | 91.55  | 222.20 |
| 4b | 0.27  | -0.40 | 0.94 | 31.00  | -32.97 | 156.00 |
|    | 0.19  | -0.28 | 0.65 | 20.92  | -24.42 | 91.55  |
|    | 0.53  | 0.27  | 0.79 | 69.89  | 31.00  | 120.34 |
|    | 1.01  | 0.58  | 1.44 | 174.56 | 78.60  | 322.07 |
|    | 0.52  | 0.06  | 0.98 | 68.20  | 6.18   | 166.45 |
|    | 0.86  | 0.5   | 1.23 | 136.32 | 64.87  | 242.12 |
|    | 0.80  | 0.62  | 0.98 | 122.55 | 85.89  | 166.45 |
|    | 0.00  | -0.27 | 0.26 | 0.00   | -23.66 | 29.69  |
| 5b | 0.90  | -0.08 | 1.88 | 145.96 | -7.69  | 555.35 |
|    | 0.86  | 0.18  | 1.54 | 136.32 | 19.72  | 366.46 |
|    | 0.76  | -0.07 | 1.58 | 113.83 | -6.76  | 385.50 |

|  |       |       |      |        |        |        |
|--|-------|-------|------|--------|--------|--------|
|  | 0.53  | -0.13 | 1.19 | 69.89  | -12.19 | 228.71 |
|  | 0.19  | -0.24 | 0.61 | 20.92  | -21.34 | 84.04  |
|  | -0.41 | -1.19 | 0.38 | -33.63 | -69.58 | 46.23  |

## References

1. H. Wu, M. Chen, H. Yang and Q. Feng, The preparation of sulfide-modified nano zero-valent iron for cefotaxime removal, *Acta Sci. Circumstantiae*, 2018, **38**, 4013-4022.
2. Y. Zhang, H. Wu, Z. Kou, P. Zhang and Y. Guan, The Dechlorination Activity of Sulfide-Modified Nanoscale Zero-Valent Iron for Pentachlorophenol and its Enhanced Reaction, *J. South Chin. Norm. Univ (Nat. Sci. Ed.)*, 2019, **51**, 42-50.
3. Y. Lou, Y. Cai, Y. Tong, L. Xie, C. Shen, X. Xu and L. Lou, Degradation of PCB153 by sulfidated nanoscale zero-valent iron, *Acta Sci. Circumstantiae*, 2019, **39**, 343-351.
4. L. Z. Zhao, X. Zhang, X. D. Jiang, Y. Q. Ma, Y. Wang and X. C. Peng, Study on Fe<sup>0</sup>/FeS Magnetic Hybrid Nanomaterials for Removal of Cr(VI) in Aqueous Solution, *Liaoning Chem. Ind.*, 2019, **48**, 844-846.
5. W. Xu, X. Hu, Y. Lou, X. Jiang, K. Shi, Y. Tong, X. Xu, C. Shen, B. Hu and L. Lou, Effects of environmental factors on the removal of heavy metals by sulfide-modified nanoscale zerovalent iron, *Environ. Res.*, 2020, **187**, 109662.
6. D. Lv, J. Zhou, Z. Cao, J. Xu, Y. Liu, Y. Li, K. Yang, Z. Lou, L. Lou and X. Xu, Mechanism and influence factors of chromium(VI) removal by sulfide-modified nanoscale zerovalent iron, *Chemosphere*, 2019, **224**, 306-315.
7. D. Lv, X. Zhou, J. Zhou, Y. Liu, Y. Li, K. Yang, Z. Lou, S. A. Baig, D. Wu and X. Xu, Design and characterization of sulfide-modified nanoscale zerovalent iron for cadmium(II) removal from aqueous solutions, *Appl. Surf. Sci.*, 2018, **442**, 114-123.
8. H. Dong, C. Zhang, J. Deng, Z. Jiang, L. Zhang, Y. Cheng, K. Hou, L. Tang and G. Zeng, Factors influencing degradation of trichloroethylene by sulfide-modified nanoscale zero-valent iron in aqueous solution, *Water Res.*, 2018, **135**, 1-10.
9. X. Jin, H. Chen, Q. Yang, Y. Hu and Z. Yang, Dechlorination of Carbon Tetrachloride by Sulfide-Modified Nanoscale Zerovalent Iron, *Environ. Eng. Sci.*, 2018, **35**, 560-567.
10. S. Song, Y. Su, A. S. Adeleye, Y. Zhang and X. Zhou, Optimal design and characterization of sulfide-modified nanoscale zerovalent iron for diclofenac removal, *Appl. Catal., B*, 2017, **201**, 211-220.
11. Z. Cao, J. Xu, H. Li, T. Ma, L. Lou, G. Henkelman and X. Xu, Dechlorination and

- defluorination capability of sulfidized nanoscale zerovalent iron with suppressed water reactivity, *Chem. Eng. J.*, 2020, **400**, 125900.
12. X. Wei, H. Yin, H. Peng, Z. Guo, G. Lu and Z. Dang, Sulfidation enhanced reduction of polybrominated diphenyl ether and Pb(II) combined pollutants by nanoscale zerovalent iron: Competitive reaction between pollutants and electronic transmission mechanism, *Chem. Eng. J.*, 2020, **395**, 125085.
  13. M. Brumovsky, J. Filip, O. Malina, J. Oborna, O. Sracek, T. G. Reichenauer, P. Andryskova and R. Zboril, Core-Shell Fe/FeS Nanoparticles with Controlled Shell Thickness for Enhanced Trichloroethylene Removal, *ACS Appl. Mater. Interfaces*, 2020, **12**, 35424-35434.
  14. B. D. Xu, D. C. Li, T. T. Qian and H. Jiang, Boosting the activity and environmental stability of nanoscale zero-valent iron by montmorillonite supporting and sulfidation treatment, *Chem. Eng. J.*, 2020, **387**, 124063.
  15. W. Xu, Z. Li, S. Shi, J. Qi, S. Cai, Y. Yu, D. M. O'Carroll and F. He, Carboxymethyl cellulose stabilized and sulfidated nanoscale zero-valent iron: Characterization and trichloroethene dechlorination, *Appl. Catal., B*, 2020, **262**, 118303.
  16. L. Liang, X. Li, Z. Lin, C. Tian and Y. Guo, The removal of Cd by sulfidated nanoscale zero-valent iron: The structural, chemical bonding evolution and the reaction kinetics, *Chem. Eng. J.*, 2020, **382**, 122933.
  17. Q. Bin, B. Lin, K. Zhu, Y. Shen, Y. Man, B. Wang, C. Lai and W. Chen, Superior trichloroethylene removal from water by sulfide-modified nanoscale zero-valent iron/graphene aerogel composite, *J. Environ. Sci. (China)*, 2020, **88**, 90-102.
  18. X. Wei, H. Yin, H. Peng, R. Chen, G. Lu and Z. Dang, Reductive debromination of decabromodiphenyl ether by iron sulfide-coated nanoscale zerovalent iron: mechanistic insights from Fe(II) dissolution and solvent kinetic isotope effects, *Environ. Pollut.*, 2019, **253**, 161-170.
  19. S. Bhattacharjee and S. Ghoshal, Optimal Design of Sulfidated Nanoscale Zerovalent Iron for Enhanced Trichloroethene Degradation, *Environ. Sci. Technol.*, 2018, **52**, 11078-11086.
  20. Y. Gong, L. Gai, J. Tang, J. Fu, Q. Wang and E. Y. Zeng, Reduction of Cr(VI) in simulated groundwater by FeS-coated iron magnetic nanoparticles, *Sci. Total Environ.*, 2017, **595**, 743-751.

21. D. Li, X. Zhu, Y. Zhong, W. Huang and P. Peng, Abiotic transformation of hexabromocyclododecane by sulfidated nanoscale zerovalent iron: Kinetics, mechanism and influencing factors, *Water Res.*, 2017, **121**, 140-149.
22. J. Tang, L. Tang, H. Feng, G. Zeng, H. Dong, C. Zhang, B. Huang, Y. Deng, J. Wang and Y. Zhou, pH-dependent degradation of p-nitrophenol by sulfidated nanoscale zerovalent iron under aerobic or anoxic conditions, *J. Hazard. Mater.*, 2016, **320**, 581-590.
23. Y. Han and W. Yan, Reductive Dechlorination of Trichloroethene by Zero-valent Iron Nanoparticles: Reactivity Enhancement through Sulfidation Treatment, *Environ. Sci. Technol.*, 2016, **50**, 12992-13001.
24. D. Li, Z. Mao, Y. Zhong, W. Huang, Y. Wu and P. Peng, Reductive transformation of tetrabromobisphenol A by sulfidated nano zerovalent iron, *Water Res.*, 2016, **103**, 1-9.
25. S. R. Rajajayavel and S. Ghoshal, Enhanced reductive dechlorination of trichloroethylene by sulfidated nanoscale zerovalent iron, *Water Res.*, 2015, **78**, 144-153.
26. Y. Su, A. S. Adeleye, A. A. Keller, Y. Huang, C. Dai, X. Zhou and Y. Zhang, Magnetic sulfide-modified nanoscale zerovalent iron (S-nZVI) for dissolved metal ion removal, *Water Res.*, 2015, **74**, 47-57.
27. L. Liang, X. Q. Li, Y. Q. Guo, Z. Lin, X. T. Su and B. Liu, The removal of heavy metal cations by sulfidated nanoscale zero-valent iron (S-nZVI): The reaction mechanisms and the role of sulfur, *J. Hazard. Mater.*, 2021, **404**, 124057.
28. H. Wang, Y. Zhong, X. Zhu, D. Li, Y. Deng, W. Huang and P. Peng, Enhanced tetrabromobisphenol A debromination by nanoscale zero valent iron particles sulfidated with S(0) dissolved in ethanol, *Environ. Sci.: Process Impacts*, 2021, **23**, 86-97.
29. J. J. Lian, M. Yang, H. L. Wang, Y. Zhong, B. Chen, W. L. Huang and P. A. Peng, Enhanced molybdenum(VI) removal using sulfide-modified nanoscale zerovalent iron: kinetics and influencing factors, *Water Sci. and Technol.*, 2021, **83**, 297-308.
30. X. Wei, Z. Guo, H. Yin, Y. Yuan, R. Chen, G. Lu and Z. Dang, Removal of heavy metal ions and polybrominated biphenyl ethers by sulfurized nanoscale zerovalent iron: Compound effects and removal mechanism, *J. Hazard. Mater.*, 2021, **414**, 125555.
31. P. Singh, P. Pal, P. Mondal, G. Saravanan, P. Nagababu, S. Majumdar, N. Labhsetwar and S. Bhowmick, Kinetics and mechanism of arsenic removal using sulfide-modified nanoscale

- zerovalent iron, *Chem. Eng. J.*, 2021, **412**, 128667.
32. G. Zhou, W. Li, C. He, X. Liu, R. Ding, Y. Wang and Y. Mu, Enhanced hydrodeiodination of iodinated contrast medium by sulfide-modified nano-sized zero-valent iron: Kinetics, mechanisms and application prospects, *Chem. Eng. J.*, 2020, **401**, 126050.
  33. S. Liu, H. Feng, L. Tang, H. Dong, J. Wang, J. Yu, C. Feng, Y. Liu, T. Luo and T. Ni, Removal of Sb(III) by sulfidated nanoscale zerovalent iron: The mechanism and impact of environmental conditions, *Sci. Total Environ.*, 2020, **736**, 139629.
  34. W. Z. Zhang, J. F. Gao, W. J. Duan, D. Zhang, J. X. Jia and Y. W. Wang, Sulfidated nanoscale zero-valent iron is an efficient material for the removal and regrowth inhibition of antibiotic resistance genes, *Environ. Pollut.*, 2020, **263**, 114508.
  35. J. Wu, J. Zhao, J. Hou, R. J. Zeng and B. Xing, Degradation of Tetrabromobisphenol A by Sulfidated Nanoscale Zerovalent Iron in a Dynamic Two-Step Anoxic/Oxic Process, *Environ. Sci. Technol.*, 2019, **53**, 8105-8114.
  36. Y. Lou, Y. Cai, Y. Tong, L. Hsieh, X. Li, W. Xu, K. Shi, C. Shen, X. Xu and L. Lou, Interaction between pollutants during the removal of polychlorinated biphenyl-heavy metal combined pollution by modified nanoscale zero-valent iron, *Sci. Total Environ.*, 2019, **673**, 120-127.
  37. Y. Han, S. Ghoshal, G. V. Lowry and J. Chen, A comparison of the effects of natural organic matter on sulfidated and nonsulfidated nanoscale zerovalent iron colloidal stability, toxicity, and reactivity to trichloroethylene, *Sci. Total Environ.*, 2019, **671**, 254-261.
  38. Y. Su, D. Jassby, S. Song, X. Zhou, H. Zhao, J. Filip, E. Petala and Y. Zhang, Enhanced Oxidative and Adsorptive Removal of Diclofenac in Heterogeneous Fenton-like Reaction with Sulfide Modified Nanoscale Zerovalent Iron, *Environ. Sci. Technol.*, 2018, **52**, 6466-6475.
  39. D. Wu, S. Peng, K. Yan, B. Shao, Y. Feng and Y. Zhang, Enhanced As(III) Sequestration Using Sulfide-Modified Nano-Scale Zero-Valent Iron with a Characteristic Core-Shell Structure: Sulfidation and As Distribution, *ACS Sustainable Chem. Eng.*, 2018, **6**, 3039-3048.
  40. D. Zhang, J. Shen, H. Shi, G. Su, X. Jiang, J. Li, X. Liu, Y. Mu and L. Wang, Substantially enhanced anaerobic reduction of nitrobenzene by biochar stabilized sulfide-modified nanoscale zero-valent iron: Process and mechanisms, *Environ. Int.*, 2019, **131**, 105020.
  41. H. Liu, S. Cheng, C. Li and X. Fan, Preparation of attapulgite-loaded sulfide-modified nanoscale zero-valent and its adsorption of As(III) from aqueous solution, *J. Wuhan Univ. Sci.*

*Technol.*, 2020, **43**, 30-36.

42. L. Chu, Q. Xu, H. Zhang and W. Zhang, Preparation of Sulfided Nano—iron and Removal of Methylene Blue, *Ind. Saf. Environ. Prot.*, 2020, **46**, 76-79.
